# Supplementary material
Source: publisher site journal article supplement (https://www.dovepress.com/article/265641)
Supplement: Supplementary file 1 [file get_supplementary_file.php]

**Fig S1:** PCR amplification of the candidate reference genes; M-100 bp ladder, 1. Act2, 2. Act3, 3. Act7, 4. EF1-A, 5. GAPDH, 6. H2A, 7. TUB-A, 8. TUB-B, 9. 18SrRNA, 10. hyp1

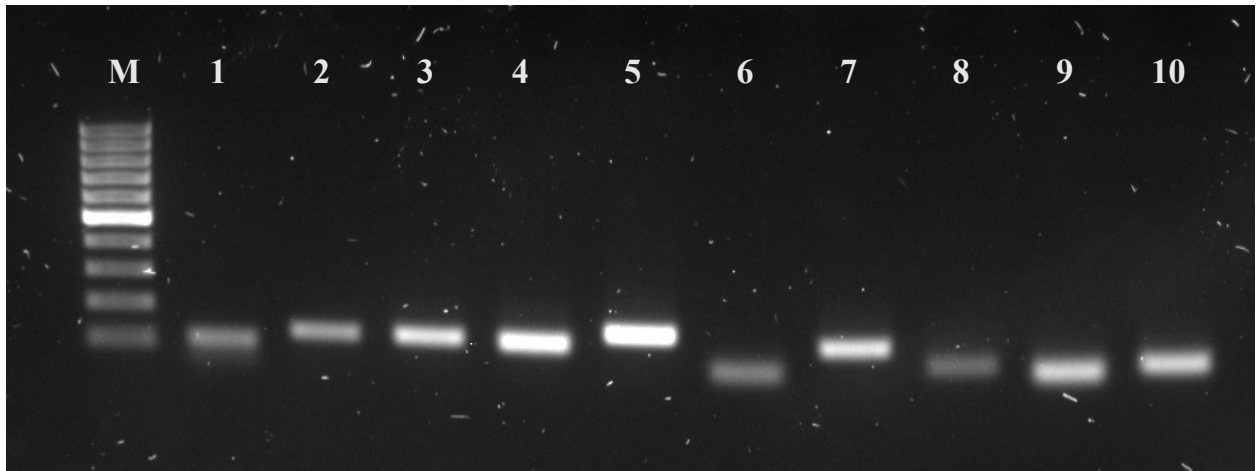

**Fig S2** melting curve analysis of 9 reference genes; Fig S2: Agarose Gel Electrophoresis of PCR amplification of 9 reference genes; 1. Act2, 2. Act3, 3. Act7, 4. EF1-A, 5. GAPDH, 6. H2A, 7. TUB-A, 8. TUB-B, 9. 18SrRNA, 10. hyp1

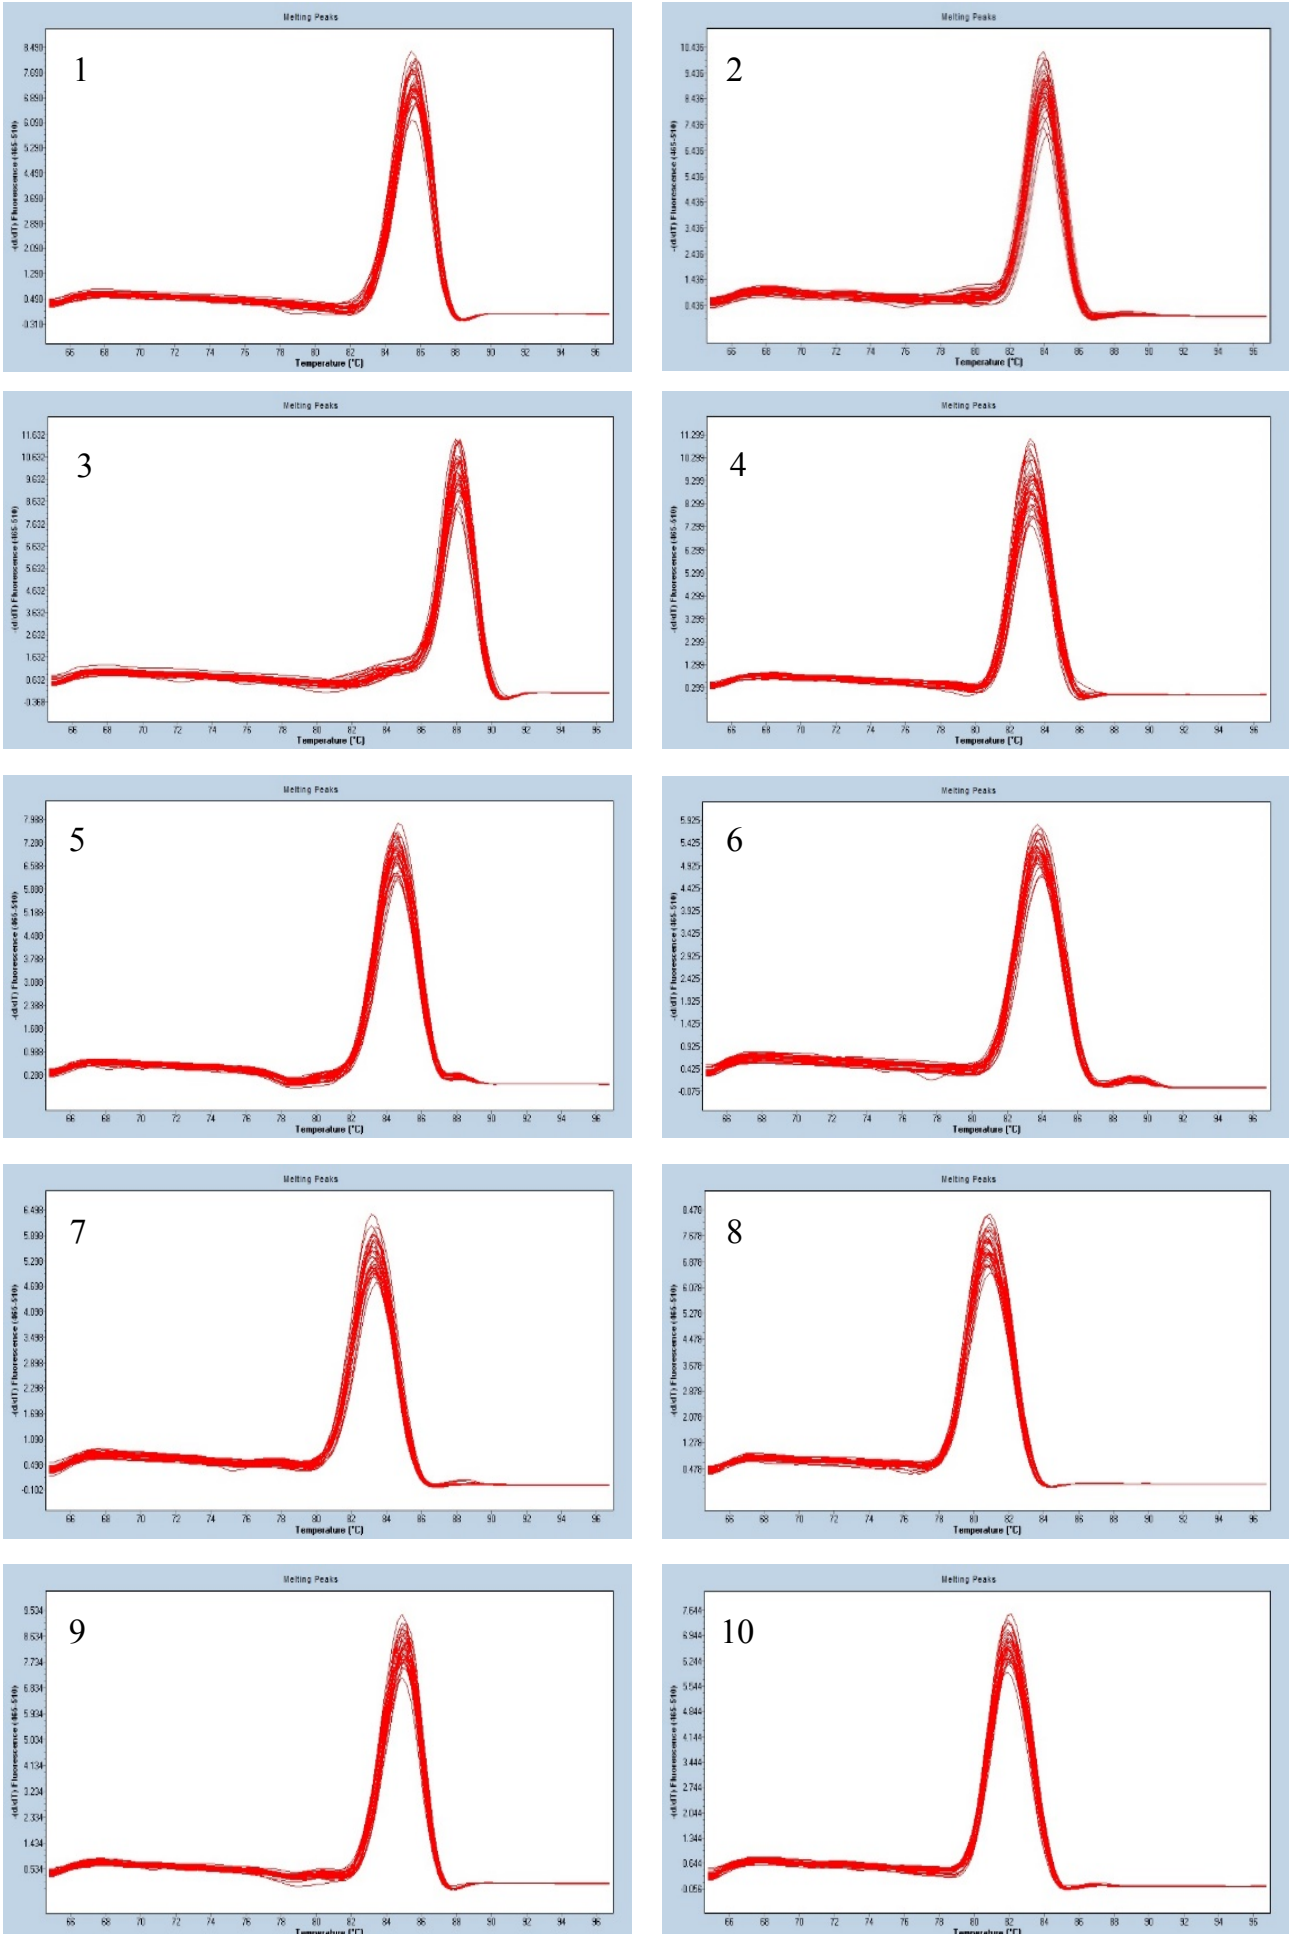

Table S1: RNA quality and integrity.

| Sample Name | Species                     | Tissue           | RIN | Conc. (ng/ $\mu$ L) | A260/A280 | A260/A230 |
|-------------|-----------------------------|------------------|-----|---------------------|-----------|-----------|
| C 0.5-A     | <i>Hypericum perforatum</i> | Suspension Cells | 8.0 | 1721                | 2.09      | 2.07      |
| C 0.5-B     | <i>H. perforatum</i>        | Suspension Cells | 8.1 | 1568                | 2.13      | 2.21      |
| C 0.5-C     | <i>H. perforatum</i>        | Suspension Cells | 8.3 | 981                 | 2.12      | 2.21      |
| C 4-A       | <i>H. perforatum</i>        | Suspension Cells | 8.4 | 916                 | 2.10      | 2.19      |
| C 4-B       | <i>H. perforatum</i>        | Suspension Cells | 8.3 | 1561                | 2.12      | 2.19      |
| C 4-C       | <i>H. perforatum</i>        | Suspension Cells | 8.6 | 1357                | 2.10      | 2.18      |
| C 12-A      | <i>H. perforatum</i>        | Suspension Cells | 8.4 | 713                 | 2.09      | 2.14      |
| C 12-B      | <i>H. perforatum</i>        | Suspension Cells | 8.2 | 800                 | 2.09      | 2.14      |
| C 12-C      | <i>H. perforatum</i>        | Suspension Cells | 8.4 | 902                 | 2.11      | 2.19      |
| G 0.5-A     | <i>H. perforatum</i>        | Suspension Cells | 8.3 | 1420                | 2.11      | 2.20      |
| G 0.5-B     | <i>H. perforatum</i>        | Suspension Cells | 8.2 | 1860                | 2.12      | 2.15      |
| G 0.5-C     | <i>H. perforatum</i>        | Suspension Cells | 8.3 | 1834                | 2.12      | 2.18      |
| G 4-A       | <i>H. perforatum</i>        | Suspension Cells | 8.5 | 1019                | 2.11      | 2.19      |
| G 4-B       | <i>H. perforatum</i>        | Suspension Cells | 8.4 | 690                 | 2.08      | 2.16      |
| G 4-C       | <i>H. perforatum</i>        | Suspension Cells | 8.4 | 731                 | 2.09      | 2.17      |
| G 12-A      | <i>H. perforatum</i>        | Suspension Cells | 8.5 | 915                 | 2.10      | 2.17      |
| G 12-B      | <i>H. perforatum</i>        | Suspension Cells | 8.6 | 920                 | 2.10      | 2.21      |
| G 12-C      | <i>H. perforatum</i>        | Suspension Cells | 8.6 | 698                 | 2.10      | 2.21      |
| S 0.5-A     | <i>H. perforatum</i>        | Suspension Cells | 7.9 | 1950                | 2.13      | 2.20      |
| S 0.5-B     | <i>H. perforatum</i>        | Suspension Cells | 7.8 | 340                 | 2.14      | 2.22      |
| S 0.5-C     | <i>H. perforatum</i>        | Suspension Cells | 8.2 | 1503                | 2.11      | 2.22      |
| S 4-A       | <i>H. perforatum</i>        | Suspension Cells | 8.4 | 1387                | 2.15      | 2.25      |
| S 4-B       | <i>H. perforatum</i>        | Suspension Cells | 7.9 | 1101                | 2.12      | 2.25      |
| S 4-C       | <i>H. perforatum</i>        | Suspension Cells | 7.9 | 678                 | 2.11      | 2.24      |
| S 12-A      | <i>H. perforatum</i>        | Suspension Cells | 7.7 | 561                 | 2.18      | 2.27      |
| S 12-B      | <i>H. perforatum</i>        | Suspension Cells | 7.7 | 399                 | 2.14      | 2.26      |
| S 12-C      | <i>H. perforatum</i>        | Suspension Cells | 7.6 | 228                 | 2.12      | 2.15      |



Table S3: Ranking based on NormFinder analysis

|                     | <b>Rank</b> | <b>1</b>                       | <b>2</b>                       | <b>3</b>                       | <b>4</b>                      | <b>5</b>                      | <b>6</b>                      | <b>7</b>        | <b>8</b>                       | <b>9</b>                       |
|---------------------|-------------|--------------------------------|--------------------------------|--------------------------------|-------------------------------|-------------------------------|-------------------------------|-----------------|--------------------------------|--------------------------------|
| <b>Gold 0.5 h</b>   | Gene        | <i>EF1-<math>\alpha</math></i> | <i>TUB-<math>\alpha</math></i> | <i>ACT7</i>                    | <i>TUB-<math>\beta</math></i> | <i>ACT3</i>                   | <i>H2A</i>                    | <i>GAPDH</i>    | <i>18S rRNA</i>                | <i>ACT2</i>                    |
|                     | Stability   | 0.033                          | 0.047                          | 0.055                          | 0.056                         | 0.06                          | 0.104                         | 0.131           | 0.143                          | 0.153                          |
| <b>Silver 0.5 h</b> | Gene        | <i>ACT7</i>                    | <i>TUB-<math>\alpha</math></i> | <i>EF1-<math>\alpha</math></i> | <i>ACT3</i>                   | <i>H2A</i>                    | <i>TUB-<math>\beta</math></i> | <i>ACT2</i>     | <i>GAPDH</i>                   | <i>18S rRNA</i>                |
|                     | Stability   | 0.05                           | 0.068                          | 0.085                          | 0.087                         | 0.089                         | 0.096                         | 0.118           | 0.143                          | 0.176                          |
| <b>Gold 4 h</b>     | Gene        | <i>ACT2</i>                    | <i>EF1-<math>\alpha</math></i> | <i>18S rRNA</i>                | <i>ACT7</i>                   | <i>TUB-<math>\beta</math></i> | <i>H2A</i>                    | <i>GAPDH</i>    | <i>TUB-<math>\alpha</math></i> | <i>ACT3</i>                    |
|                     | Stability   | 0.077                          | 0.096                          | 0.109                          | 0.12                          | 0.129                         | 0.141                         | 0.141           | 0.184                          | 0.189                          |
| <b>Silver 4 h</b>   | Gene        | <i>GAPDH</i>                   | <i>TUB-<math>\alpha</math></i> | <i>EF1-<math>\alpha</math></i> | <i>ACT2</i>                   | <i>H2A</i>                    | <i>ACT3</i>                   | <i>ACT7</i>     | <i>TUB-<math>\beta</math></i>  | <i>18S rRNA</i>                |
|                     | Stability   | 0.059                          | 0.101                          | 0.113                          | 0.164                         | 0.176                         | 0.229                         | 0.389           | 0.784                          | 1.029                          |
| <b>Gold 12 h</b>    | Gene        | <i>H2A</i>                     | <i>GAPDH</i>                   | <i>EF1-<math>\alpha</math></i> | <i>ACT3</i>                   | <i>ACT7</i>                   | <i>ACT2</i>                   | <i>18S rRNA</i> | <i>TUB-<math>\beta</math></i>  | <i>TUB-<math>\alpha</math></i> |
|                     | Stability   | 0.14                           | 0.154                          | 0.179                          | 0.223                         | 0.239                         | 0.292                         | 0.389           | 0.431                          | 0.547                          |
| <b>Silver 12 h</b>  | Gene        | <i>TUB-<math>\alpha</math></i> | <i>EF1-<math>\alpha</math></i> | <i>GAPDH</i>                   | <i>ACT2</i>                   | <i>ACT7</i>                   | <i>ACT3</i>                   | <i>H2A</i>      | <i>TUB-<math>\beta</math></i>  | <i>18S rRNA</i>                |
|                     | Stability   | 0.08                           | 0.15                           | 0.156                          | 0.179                         | 0.213                         | 0.219                         | 0.324           | 0.764                          | 1.579                          |

Table S4: Ranking based on Bestkeeper analysis

|                     | Rank | 1                              | 2                              | 3                              | 4                              | 5               | 6                              | 7                             | 8           | 9                              |
|---------------------|------|--------------------------------|--------------------------------|--------------------------------|--------------------------------|-----------------|--------------------------------|-------------------------------|-------------|--------------------------------|
| <b>Gold 0.5 h</b>   | Gene | <i>EF1-<math>\alpha</math></i> | <i>ACT7</i>                    | <i>TUB-<math>\alpha</math></i> | <i>GAPDH</i>                   | <i>ACT3</i>     | <i>TUB-<math>\beta</math></i>  | <i>H2A</i>                    | <i>ACT2</i> | <i>18S-rRNA</i>                |
|                     | SD   | 0.093403                       | 0.098941                       | 0.1                            | 0.104375                       | 0.120139        | 0.131806                       | 0.14375                       | 0.223958    | 0.22625                        |
|                     | CV   | 0.502785                       | 0.37139                        | 0.41822                        | 0.511998                       | 0.413192        | 0.519345                       | 0.593753                      | 0.820185    | 1.496527                       |
| <b>Silver 0.5 h</b> | Gene | <i>ACT7</i>                    | <i>TUB-<math>\alpha</math></i> | <i>H2A</i>                     | <i>GAPDH</i>                   | <i>ACT3</i>     | <i>EF1-<math>\alpha</math></i> | <i>TUB-<math>\beta</math></i> | <i>ACT2</i> | <i>18S-rRNA</i>                |
|                     | SD   | 0.098333                       | 0.113333                       | 0.1375                         | 0.142083                       | 0.144514        | 0.151944                       | 0.159653                      | 0.193125    | 0.272535                       |
|                     | CV   | 0.369142                       | 0.474529                       | 0.567088                       | 0.696587                       | 0.497473        | 0.820065                       | 0.630053                      | 0.705963    | 1.79708                        |
| <b>Gold 4 h</b>     | Gene | <i>GAPDH</i>                   | <i>H2A</i>                     | <i>EF1-<math>\alpha</math></i> | <i>ACT2</i>                    | <i>ACT7</i>     | <i>TUB-<math>\beta</math></i>  | <i>18S-rRNA</i>               | <i>ACT3</i> | <i>TUB-<math>\alpha</math></i> |
|                     | SD   | 0.082569                       | 0.10375                        | 0.114583                       | 0.14                           | 0.182188        | 0.20191                        | 0.264896                      | 0.28375     | 0.28625                        |
|                     | CV   | 0.415383                       | 0.434555                       | 0.618297                       | 0.53568                        | 0.692629        | 0.844178                       | 1.724442                      | 1.005033    | 1.24416                        |
| <b>Silver 4 h</b>   | Gene | <i>18S-rRNA</i>                | <i>ACT3</i>                    | <i>EF1-<math>\alpha</math></i> | <i>TUB-<math>\alpha</math></i> | <i>GAPDH</i>    | <i>ACT2</i>                    | <i>H2A</i>                    | <i>ACT7</i> | <i>TUB-<math>\beta</math></i>  |
|                     | SD   | 0.287569                       | 0.531667                       | 0.605                          | 0.642917                       | 0.662083        | 0.795417                       | 0.829583                      | 0.957917    | 1.451667                       |
|                     | CV   | 1.926011                       | 1.866752                       | 3.17377                        | 2.750887                       | 3.228953        | 2.966543                       | 3.362097                      | 3.524398    | 5.767257                       |
| <b>Gold 12 h</b>    | Gene | <i>ACT2</i>                    | <i>EF1-<math>\alpha</math></i> | <i>H2A</i>                     | <i>GAPDH</i>                   | <i>18S-rRNA</i> | <i>ACT7</i>                    | <i>TUB-<math>\beta</math></i> | <i>ACT3</i> | <i>TUB-<math>\alpha</math></i> |
|                     | SD   | 0.264132                       | 0.298472                       | 0.303229                       | 0.307604                       | 0.315833        | 0.325                          | 0.375614                      | 0.432222    | 0.707083                       |
|                     | CV   | 1.015225                       | 1.684935                       | 1.294261                       | 1.570377                       | 1.930522        | 1.260178                       | 1.629871                      | 1.590027    | 3.205576                       |
| <b>Silver 12 h</b>  | Gene | <i>18S-rRNA</i>                | <i>TUB-<math>\alpha</math></i> | <i>EF1-<math>\alpha</math></i> | <i>ACT2</i>                    | <i>ACT3</i>     | <i>ACT7</i>                    | <i>GAPDH</i>                  | <i>H2A</i>  | <i>TUB-<math>\beta</math></i>  |
|                     | SD   | 0.286319                       | 1.2075                         | 1.300833                       | 1.310833                       | 1.315           | 1.355833                       | 1.35625                       | 1.507083    | 1.940833                       |
|                     | CV   | 1.763684                       | 5.352789                       | 6.872716                       | 4.794708                       | 4.630418        | 5.003537                       | 6.566074                      | 6.110107    | 7.785652                       |
